# Supplementary material for: Protective Effects of Oral Astaxanthin Nanopowder against Ultraviolet‐Induced Photokeratitis in Mice
Source: Hindawi journal article supplement (doi:10.1155/2017/1956104), 2017-01-01
Supplement: f1 [file 1956104.f1.pdf]

## Supplementary tables

Supplementary table 1: Corneal epithelial thickness, 24 hours after UVB exposure, when treated with different doses of Nano-AST

| Figure 1B   | Corneal thickness ( $\mu\text{m}$ ) | SEM  | P-value  |
|-------------|-------------------------------------|------|----------|
| UVB control | 15.2                                | 1.09 |          |
| 0.5 mg/kg   | 15.7                                | 0.41 | 0.6533   |
| 5 mg/kg     | 16.9                                | 1.94 | 0.4613   |
| 50 mg/kg    | 21.3*                               | 2.18 | 0.0319   |
| Naïve       | 24.5***                             | 0.61 | < 0.0001 |

Supplementary table 2: Comparison of Nano-AST to other antioxidant treatments

| Figure 2B   | Corneal thickness ( $\mu\text{m}$ ) | SEM  | P-value  |
|-------------|-------------------------------------|------|----------|
| UVB control | 15.2                                | 0.92 |          |
| Nano-AST    | 20.4**                              | 1.1  | 0.0022   |
| AST oil     | 16.7                                | 1.34 | 0.3489   |
| Lutein      | 14.3                                | 1.58 | 0.6556   |
| Bilberry    | 16.2                                | 1.16 | 0.3214   |
| Naive       | 25.0***                             | 0.88 | < 0.0001 |

Supplementary table 3: Mean grey value DHE (ROS) staining in cornea

| Figure 3B   | Mean grey value | SEM  | P-value |
|-------------|-----------------|------|---------|
| UVB control | 18.2            | 2.1  |         |
| Nano-AST    | 12.7*           | 0.8  | 0.0270  |
| AST oil     | 10.9**          | 0.89 | 0.0037  |
| Lutein      | 21.2            | 2.87 | 0.4081  |
| Bilberry    | 23.1            | 1.91 | 0.0902  |
| Naive       | 9.9**           | 0.91 | 0.0013  |

Supplementary table 4: Quantification of TUNEL positive cells

| Figure 4C   | TUNEL (+) cells | SEM  | P-value  |
|-------------|-----------------|------|----------|
| UVB control | 23.9            | 4.1  |          |
| Nano-AST    | 19.1***         | 4.7  | < 0.0001 |
| AST oil     | 27.6            | 2.65 | 0.7060   |
| Lutein      | 26.5            | 3.21 | 0.5179   |
| Bilberry    | 29.8            | 2.33 | 0.3846   |
| Naive       | 14.6***         | 4.19 | < 0.0001 |

Supplementary table 5: Quantification of NF-κB positive nuclei

| Figure 5B   | NF-κB (+) nuclei cells | SEM  | P-value  |
|-------------|------------------------|------|----------|
| UVB control | 15.2                   | 0.9  |          |
| Nano-AST    | 8.1***                 | 0.6  | < 0.0001 |
| AST oil     | 14.5                   | 0.83 | 0.7082   |
| Lutein      | 14.1                   | 0.86 | 0.6231   |
| Bilberry    | 14.8                   | 0.66 | 0.9757   |
| Naive       | 1.4***                 | 0.3  | < 0.0001 |

Supplementary table 6: Quantification of COX-2 positive cells ratio

| Figure 6B   | Cox-2 (+) cells ratio | SEM | P-value  |
|-------------|-----------------------|-----|----------|
| UVB control | 66.2                  | 6.1 |          |
| Nano-AST    | 34.8**                | 6.5 | 0.0078   |
| AST oil     | 56.4                  | 2.4 | 0.1741   |
| Lutein      | 65.6                  | 4.1 | 0.9406   |
| Bilberry    | 69.0                  | 2.8 | 0.6914   |
| Naive       | 14.7***               | 3.6 | < 0.0001 |

Supplementary table 7: Quantitative PCR analysis of TNF $\alpha$  expression in the mouse cornea

| Figure 7    | Fold change | SEM  | P-value |
|-------------|-------------|------|---------|
| UVB control | 2.26        | 0.4  |         |
| Nano-AST    | 1.03*       | 0.17 | 0.0242  |
| AST oil     | 2.4         | 0.4  | 0.7807  |
| Lutein      | 2.01        | 0.44 | 0.6875  |
| Bilberry    | 2.1         | 0.21 | 0.7274  |
| Naive       | 0.51**      | 0.11 | 0.0033  |

Values are presented as average $\pm$ standard error of the mean (SEM). The P values of experimental group were compared with UVB control group. The following markings used in the manuscript figures:

non-significant; (n.s.), ( $p>0.05$ ); \*, ( $p<0.05$ ); \*\*, ( $p<0.01$ ); \*\*\*, ( $p<0.001$ ).
